# Supplementary material for: 2D hexagonal CuGaSe2 nanosheets by a microwave assisted synthesis method: photoresponse and optical study for optoelectronic applications
Source: Royal Society of Chemistry journal article supplement (doi:10.1039/d4ce00376d), 2024-01-01
Supplement: d4ce00376d1.pdf [file d4ce00376d1.pdf]

## Supporting Information

### **2D Hexagonal CuGaSe<sub>2</sub> Nanosheets by Microwave Assisted Synthesis Method: The Photo Response and Optical Study for Optoelectronic Applications**

P. Priyadarshini<sup>1</sup>, S. Senapati<sup>1\*</sup>, Prabhukrupa C Kumar<sup>1</sup>, D. Alagarasan<sup>2</sup>, Rojalin Sahu<sup>3</sup>,  
R. Naik<sup>1\*</sup>

*<sup>1</sup>Institute of Chemical Technology, Indian Oil Odisha Campus, Bhubaneswar, 751013,  
India.*

*<sup>2</sup>Department of Physics, Nitte Meenakshi Institute of Technology, Yelahanka, Bengaluru,  
560064, India*

*<sup>3</sup>Department of Chemistry, School of Applied Science, KIIT Deemed to be University,  
Bhubaneswar, 751024, India*

*\*Corresponding author: [subrata.uu@gmail.com](mailto:subrata.uu@gmail.com); [ramakanta.naik@gmail.com](mailto:ramakanta.naik@gmail.com)*

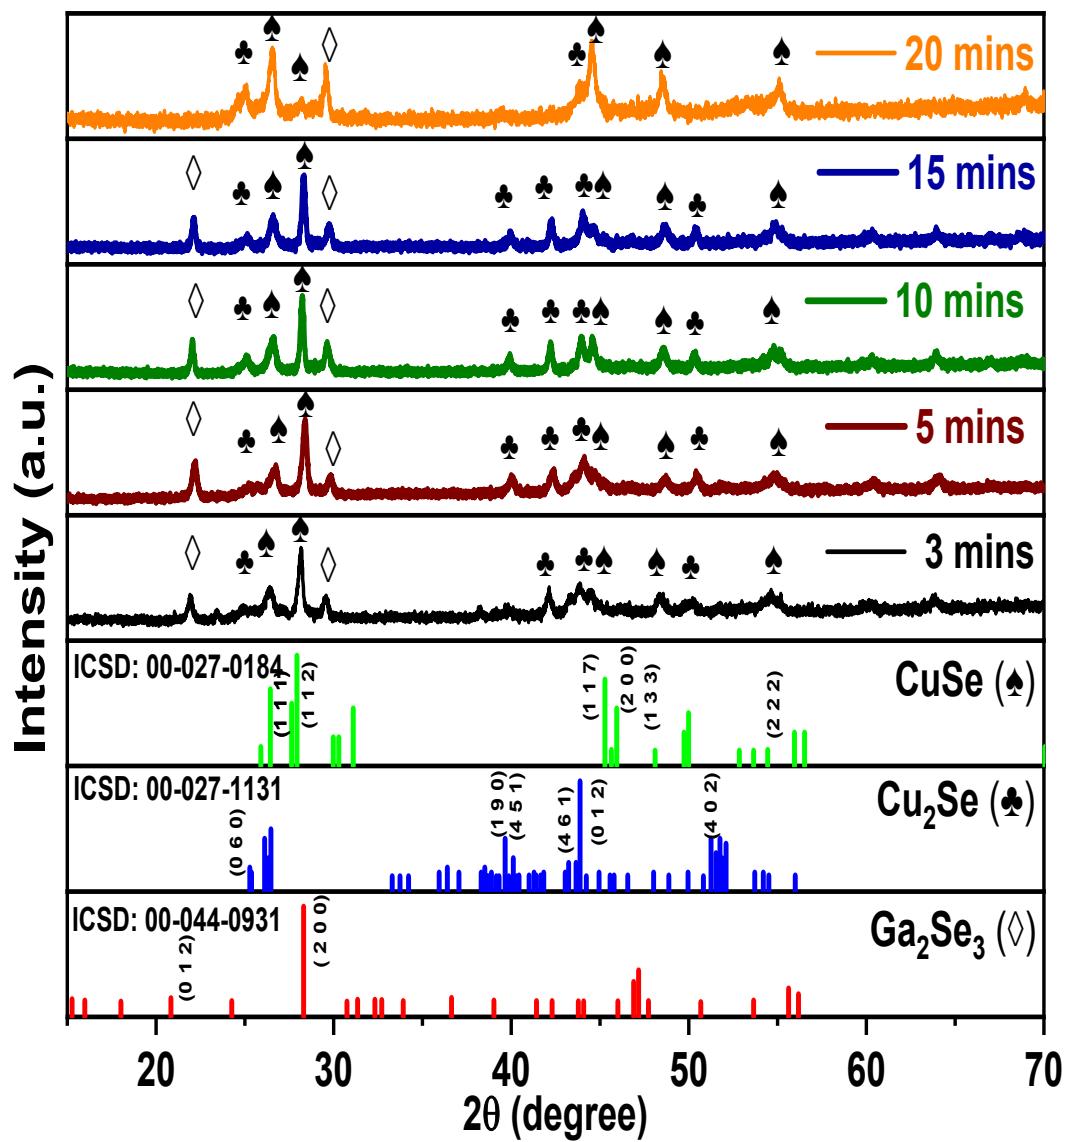

Fig. S1. XRD pattern of CGS with different irradiation time.

**Table S1.** The variation in positions and FWHM values of CuSe (1 1 2), Cu<sub>2</sub>Se (0 6 0), and Ga<sub>2</sub>Se<sub>3</sub> (2 0 0) for all samples.

| Sample            | CuSe (1 1 2)                       |      | Cu <sub>2</sub> Se (0 6 0)         |      | Ga <sub>2</sub> Se <sub>3</sub> (2 0 0) |      |
|-------------------|------------------------------------|------|------------------------------------|------|-----------------------------------------|------|
|                   | Peak position (20 <sub>112</sub> ) | FWHM | Peak position (20 <sub>060</sub> ) | FWHM | Peak position (20 <sub>200</sub> )      | FWHM |
| <b>CGS-3mins</b>  | 27.89                              | 0.34 | 25.17                              | 0.26 | 28.20                                   | 0.27 |
| <b>CGS-5mins</b>  | 27.91                              | 0.39 | 25.19                              | 0.24 | 28.21                                   | 0.29 |
| <b>CGS-10mins</b> | 27.92                              | 0.31 | 25.21                              | 0.25 | 28.21                                   | 0.28 |
| <b>CGS-15mins</b> | 27.91                              | 0.41 | 25.20                              | 0.27 | 28.25                                   | 0.31 |
| <b>CGS-20mins</b> | 27.93                              | 0.37 | 25.23                              | 0.26 | 28.23                                   | 0.32 |

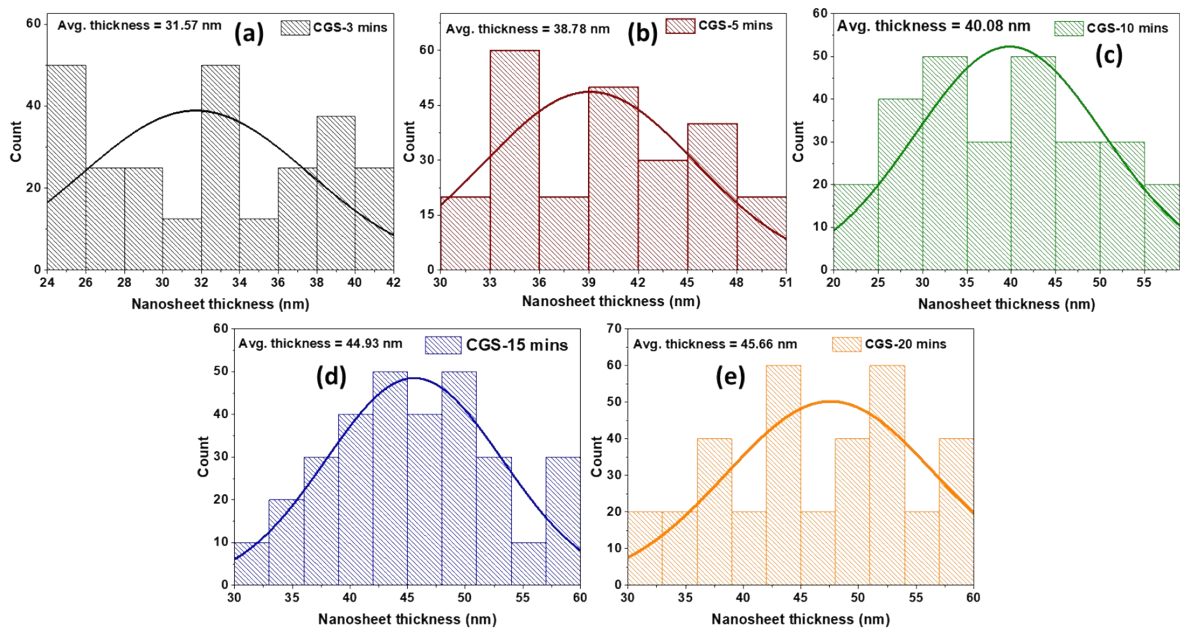

**Fig. S2.** Nanosheet thickness variation of CGS with different irradiation time.

**Table S2.** The composition analysis table of irradiation varied CGS NS.

| <b>Sample</b>   | <b>CGS-3mins</b> |            |                | <b>CGS-20mins</b> |            |                |
|-----------------|------------------|------------|----------------|-------------------|------------|----------------|
| <b>Elements</b> | <b>EDX</b>       | <b>XPS</b> | <b>ICP-OES</b> | <b>EDX</b>        | <b>XPS</b> | <b>ICP-OES</b> |
| <b>Cu</b>       | 25.01            | 24.66      | 24.56          | 25.21             | 25.11      | 24.76          |
| <b>Ga</b>       | 24.78            | 24.59      | 24.33          | 25.54             | 24.97      | 24.34          |
| <b>Se</b>       | 50.21            | 50.75      | 51.11          | 49.25             | 49.92      | 50.90          |
| <b>Total</b>    | 100              | 100        | 100            | 100               | 100        | 100            |

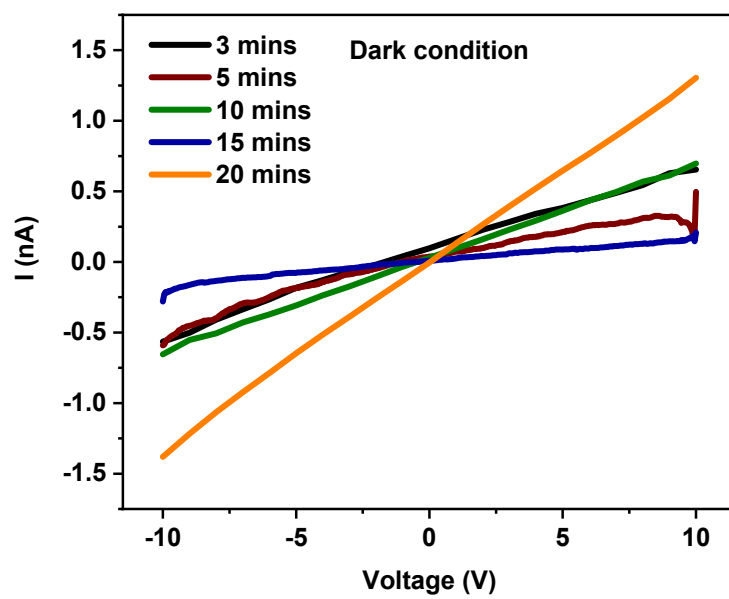

**Fig. S3.** Cumulative current-voltage curve of CGS NS under dark conditions.

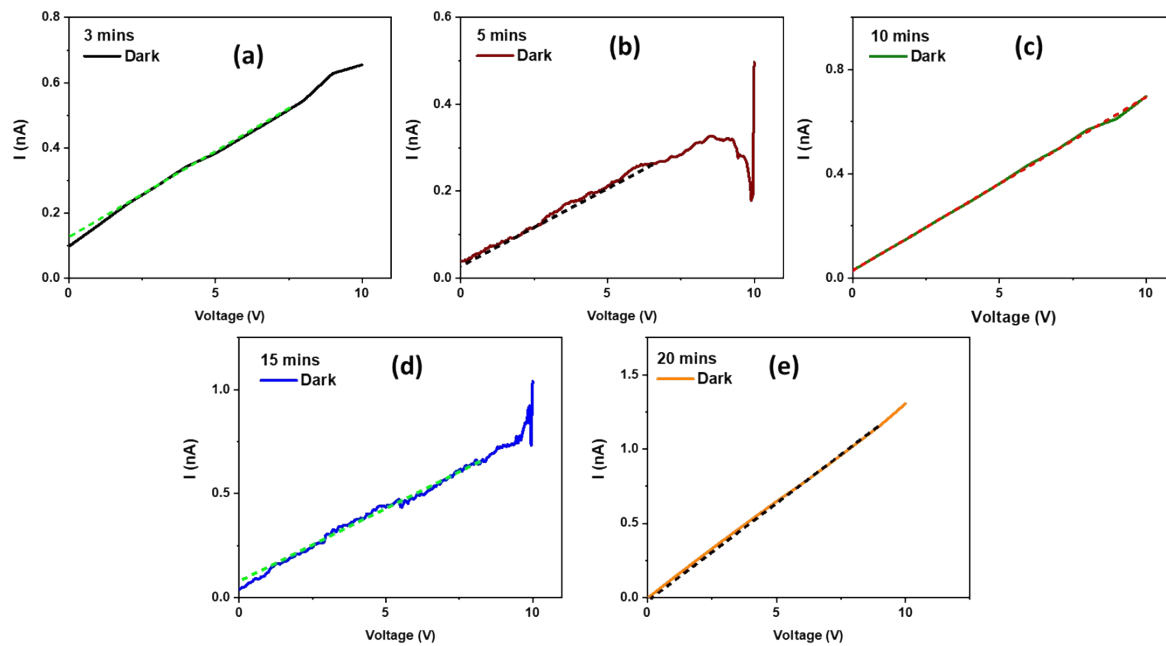

Fig. S4. Resistance evaluation in dark conditions for all studied samples.
